# Supplementary material
Source: Royal Society of Chemistry journal article supplement (doi:10.1039/d6ma00227g)
Supplement: d6ma00227g1.pdf [file d6ma00227g1.pdf]

**Enhanced Faradaic Pseudo-capacitance in reduced  $\pi$ -conjugated carbon network anchored with Strontium Tungstate Nano-Hybrids for High-Energy Supercapacitors**

Sabarikaruthapandi Ramar<sup>a</sup>, Ponnaiah Sathish Kumar<sup>b</sup>, Bharathi Kannan Raja<sup>a</sup>,  
Muthukumar Govindaraj<sup>a,c</sup>, and Arockia Selvi J<sup>a\*</sup>

<sup>a</sup>Department of Chemistry, SRM Institute of Science and Technology, Kattankulathur  
603203, Tamil Nadu, India.

<sup>b</sup>Department of Chemical Engineering, Pohang University of Science and Technology  
(POSTECH), Pohang 37673, Republic of Korea.

<sup>c</sup>Institute of Industrial Science, The University of Tokyo, 4-6-1 Komaba, Meguro-Ku,  
Tokyo 153–8505, Japan.

Corresponding author\*

E-mail: [arockiaj@srmist.edu.in](mailto:arockiaj@srmist.edu.in) (Prof. Dr. Arockia Selvi J)

## 1. Material

The following items were bought from Sigma Aldrich: graphite powder ( $\geq 99.99\%$ , Product No. 496596), potassium permanganate ( $\geq 99.0\%$ , Product No. 223468), sodium tungstate dihydrate ( $\text{Na}_2\text{WO}_4 \cdot 2\text{H}_2\text{O}$ ,  $\geq 99.0\%$ , Product No. 223336), nitric acid (70%, Product No. 438073), sulphuric acid (95–98%, Product No. 258105), hydrogen peroxide (30% in  $\text{H}_2\text{O}_2$ , Product. No. 216763), Strontium chloride hexahydrate ( $\text{SrCl}_2 \cdot 6\text{H}_2\text{O}$ , 99.99%, Product No. 203874), NaOH (Bio reagent, Product No. U5378), hydrochloric acid (37%, Product No. 258148), polyvinylidene difluoride (PVDF, average Mw  $\sim 534,000$ , Product No. 182702), n-methyl pyrrolidinone (NMP  $\geq 99.0\%$ , Product No. 443778), and carbon black (conductive, Product No. 940232). All the experiments utilised deionised (DI) water obtained from a Millipore water system.

### 1.1. Materials and Characterisation

High-resolution scanning electron microscopy (HR-SEM, Thermo Scientific Apreo S) and transmission electron microscopy (TEM, JEM-2100 Plus, JEOL) were used to explore the morphological, chemical and surface properties, and the selected-area electron diffraction (SAED) patterns of the produced  $\text{SrWO}_4$  and reduced graphene oxide (rGO). Energy-dispersive spectroscopy (EDS; JEOL JSM-2100 Plus and Thermo Scientific Apreo S) was used for chemical and elemental composition analysis. X-ray diffraction spectroscopy (XRD-X'pert powder XRD system, Malvern PANalytical, United Kingdom) with Cu  $K\alpha$  radiation ( $\lambda = 0.154\text{ nm}$ ) at 45 kV (tension) and 40 mA (current) with  $0.02^\circ$  per step scan and  $1^\circ$  per min speed was used to establish the crystallinity of  $\text{SrWO}_4$  and GO. Using Fourier transform infrared spectroscopy (FT-IR), the functional groups of the synthesised samples were analysed with an attenuated total reflection (ATR) FT-IR spectrophotometer (Shimadzu IR Tracer-100). Raman spectra of the materials were analysed using a 633 nm excitation laser (HORIBA France, LABRAM HR Evolution). For physical specific surface area and pore size, rGO was measured using a Quantachrome Instruments Autosorb-iQ series (degassed at  $120^\circ\text{C}$  for 12 h before measurement). X-ray photoelectron spectroscopy (XPS) using a PHI Versa Probe III Scanning XPS Microprobe (Physical Electronics) confirmed the chemical state, bonding nature, and binding energy.

Uv-vis spectrophotometer (SHIMADZU, UV 3600 PLUS) was utilized to analyse optical absorption and the scattering properties of the catalyst.

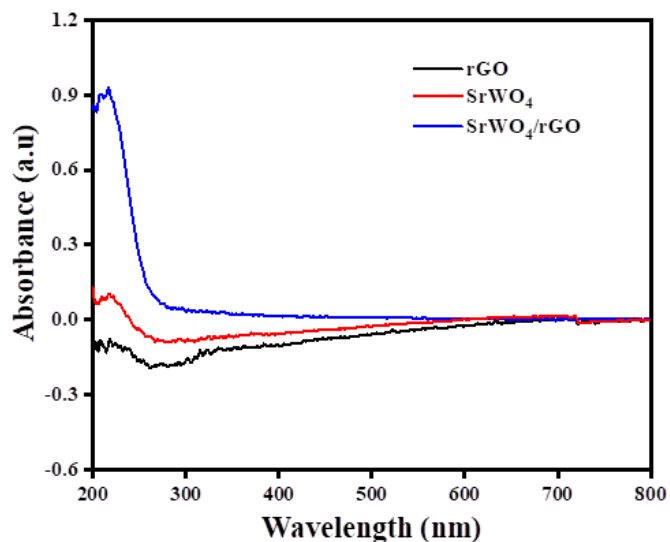

**Fig. S1.** UV-vis spectra for rGO (black curve), SrWO<sub>4</sub> (red curve) and SrWO<sub>4</sub>/rGO (blue curve).

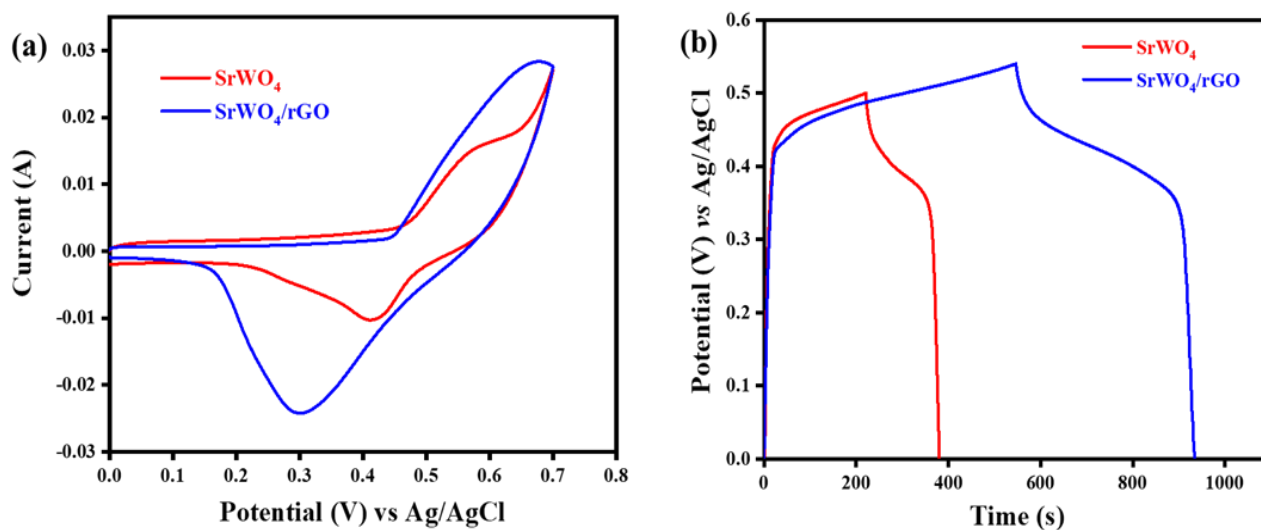

**Fig. S2.** (a) CV curves at 50 mVs<sup>-1</sup> and GCD curves at 1 A g<sup>-1</sup> for SrWO<sub>4</sub> (red curve) and SrWO<sub>4</sub>/rGO (blue curve) in 1 M KOH electrolyte.

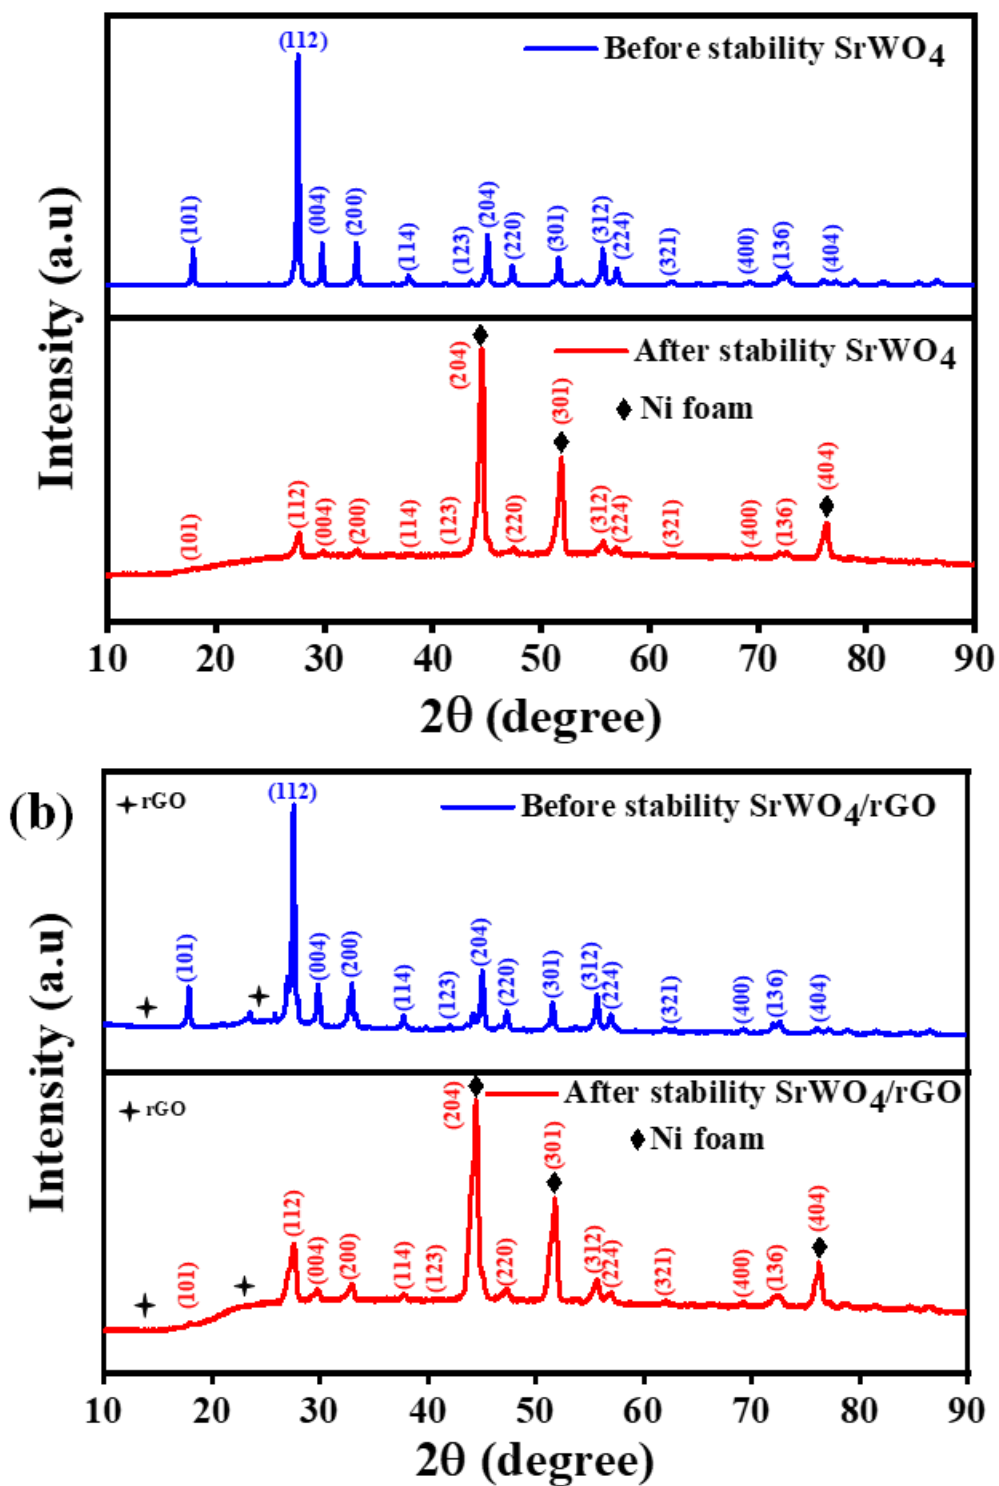

Fig. S3. (a) Pre and Post cyclic stability XRD for SrWO<sub>4</sub> (b) Pre and Post cyclic stability XRD for SrWO<sub>4</sub>/rGO

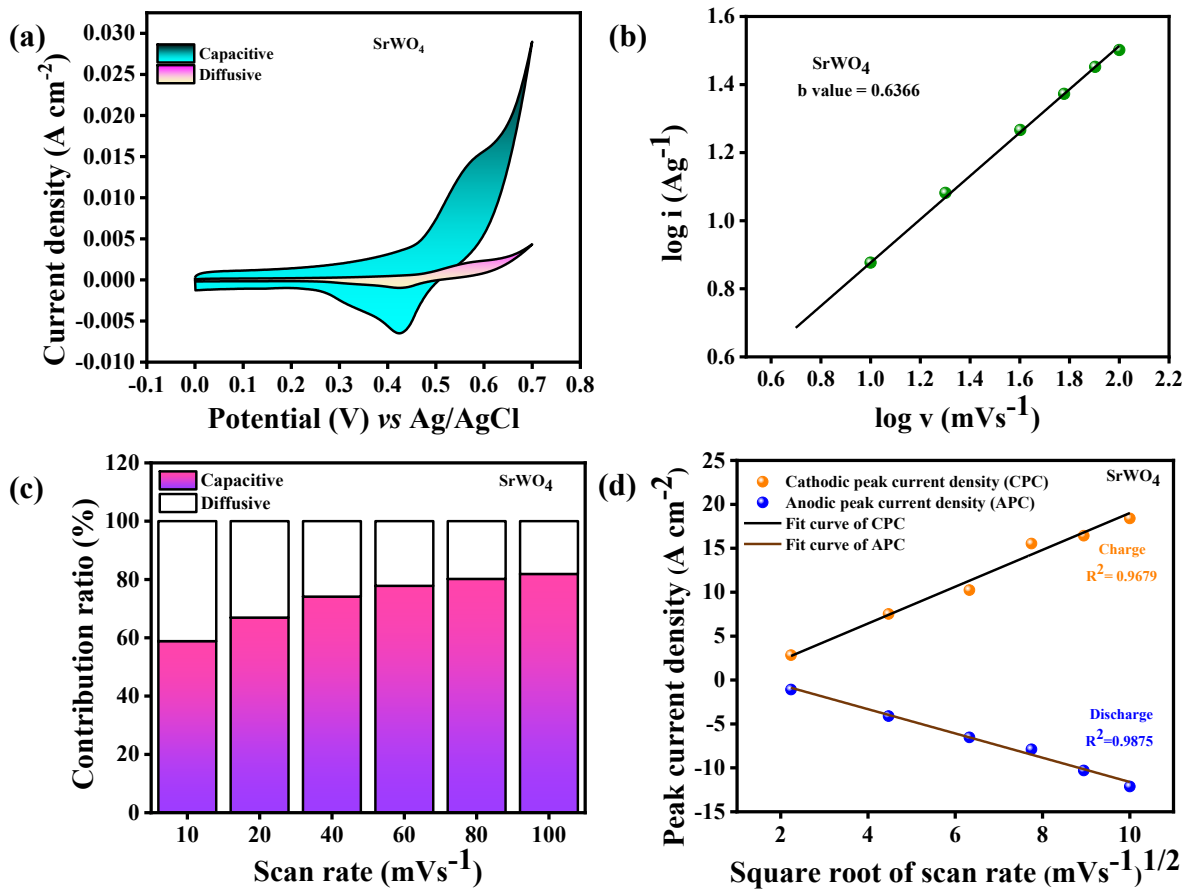

**Fig. S4.** Donnan method calculation for (a) CV of SrWO<sub>4</sub> at 50 mVs<sup>-1</sup>, (b) Logarithmic relationship of scan rate vs peak current density, (c) Capacitance contribution of SrWO<sub>4</sub> at 10-100 mVs<sup>-1</sup>, (d) The square root of the scan rate shown against the peak current density.

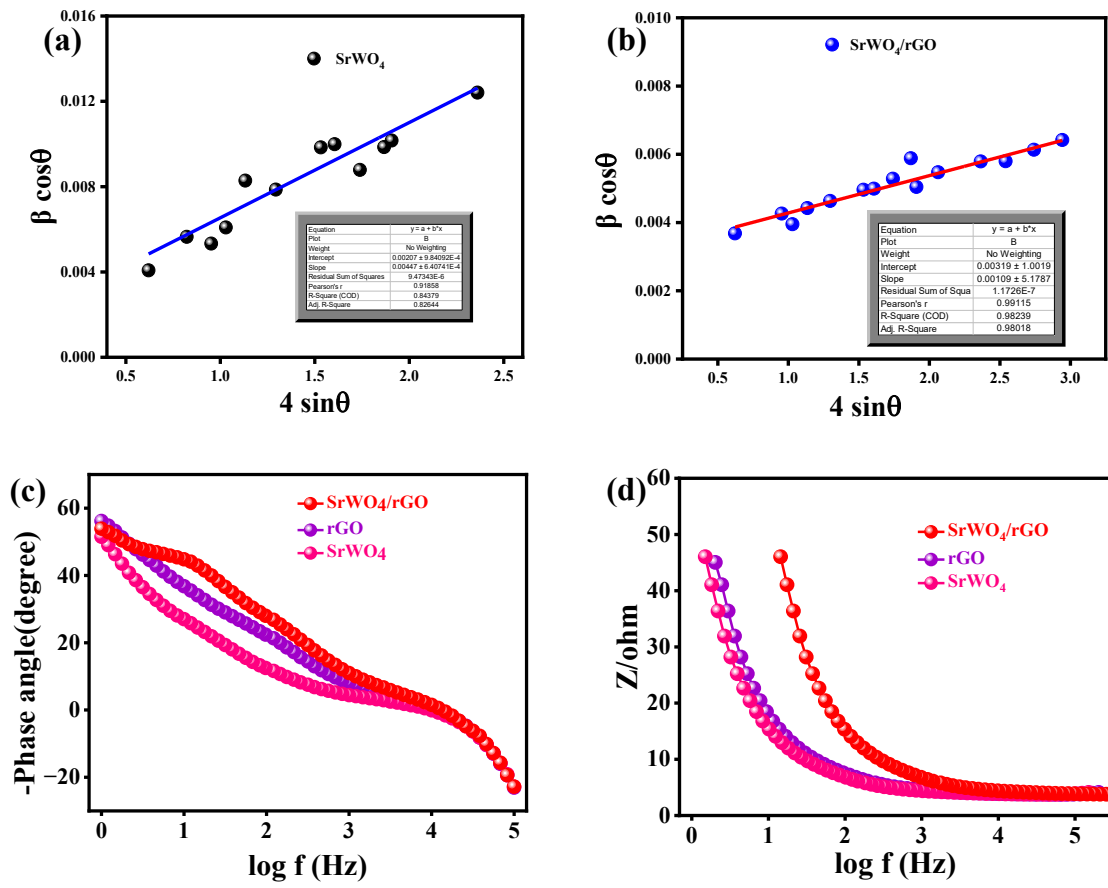

**Fig. S5.** (a-b), W-H plot for SrWO<sub>4</sub> and SrWO<sub>4</sub>/rGO, (c-d) Bode phase and Bode plot for SrWO<sub>4</sub>, rGO, SrWO<sub>4</sub>/rGO.

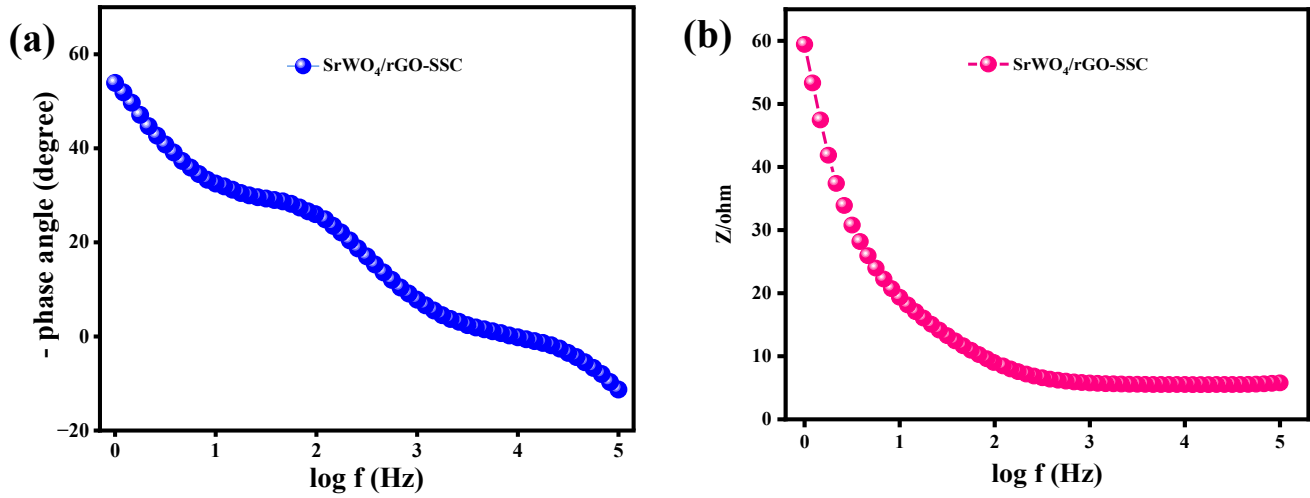

**Fig. S6. (a-b)** Bode phase and Bode plot for SrWO<sub>4</sub>/rGO-SSC

The following formulas were used to calculate the mean crystal size (eq 1), dislocation density (eq 2), and the sample's microstrain (eq 3); results are displayed in **Table S1**.

$$D = \frac{K\lambda}{\beta \cos \theta} \quad (1)$$

$$\delta = \frac{1}{D^2} \quad (2)$$

$$\varepsilon = \frac{\beta}{4 \tan \theta} \quad (3)$$

In this equation, “D” represents crystallite size, “K” represents crystal lattice constant (0.94), “β” represents full width at half maximum (FWHM), “λ” represents X-ray wavelength (1.5406), “θ” represents an angle of diffraction, “δ” represents dislocation density, and “ε” represents microstrain.<sup>1,2</sup>

| Material               | Crystallite size (nm) | Crystallinity Index (%) | Micro Strain (ε) (nm <sup>-2</sup> ) | Dislocation Density (δ) (nm <sup>-2</sup> ) |
|------------------------|-----------------------|-------------------------|--------------------------------------|---------------------------------------------|
| SrWO <sub>4</sub>      | 78.443                | 83.38                   | 0.236                                | 1.63 x 10 <sup>-4</sup>                     |
| SrWO <sub>4</sub> /rGO | 59.275                | 68.75                   | 0.441                                | 13.62 x 10 <sup>-4</sup>                    |

**Table S1.** Crystalline parameters of the prepared materials.

| <b>Electrodes</b>      | <b>R<sub>s</sub></b><br><b>(Ω)</b> | <b>R<sub>ct</sub></b><br><b>(Ω)</b> | <b>C<sub>dl</sub></b><br><b>(μF cm<sup>2</sup>)</b> |
|------------------------|------------------------------------|-------------------------------------|-----------------------------------------------------|
| SrWO <sub>4</sub>      | 4.2                                | 15.3                                | 9.3                                                 |
| rGO                    | 0.8                                | 2.2                                 | 181                                                 |
| SrWO <sub>4</sub> /rGO | 1.3                                | 4.8                                 | 360                                                 |

**Table S2.** Electrochemical Impedance Parameters

## 2.0 Energy density (*E*) calculation

The *E* of the STS device were calculated using the following equations:

$$E = \frac{C_s \Delta v^2}{7.2} (Wh kg^{-1})$$

where  $\Delta t$  is the discharge time (s),  $\Delta V$  is the cell operating voltage window, and  $C_s$  denotes the specific capacitance ( $F g^{-1}$ ) of the STS, determined using the total mass of the active materials.<sup>3</sup>

With the following parameters, Specific capacitance ( $C_s$ ) = 83.6  $F g^{-1}$  at 1  $Ag^{-1}$  and Voltage window ( $\Delta V$ ) = 1.5 V, *E* is calculated as follows.

$$E = \frac{83.6 \times (1.5)^2}{7.2}$$

$$E = \frac{188.1}{7.2}$$

$$E = 26.13 Wh kg^{-1}$$

| S. No. | Material                                               | Synthesis Method                | Morphology (Metal Tungstate)    | Electrolyte                        | Specific capacity                             |                                               | Device Configuration                                                                | Potential window (V) | Ref No.          |
|--------|--------------------------------------------------------|---------------------------------|---------------------------------|------------------------------------|-----------------------------------------------|-----------------------------------------------|-------------------------------------------------------------------------------------|----------------------|------------------|
|        |                                                        |                                 |                                 |                                    | 3 electrode system                            | 2-electrode system                            |                                                                                     |                      |                  |
| 1.     | CoWO <sub>4</sub> /NRGO                                | Sonochemical                    | Irregular-shaped agglomerations | 2 M H <sub>2</sub> SO <sub>4</sub> | -                                             | 597 F g <sup>-1</sup> at 5 mV s <sup>-1</sup> | CoWO <sub>4</sub> /NRGO//                                                           | -0.5 to 0.5          | 4                |
| 2.     | CoMnWO <sub>4</sub>                                    | co-precipitation                | Sphere                          | 1 M KOH                            | 444 F g <sup>-1</sup> at 1 Ag <sup>-1</sup>   | 112 F g <sup>-1</sup> at 1 Ag <sup>-1</sup>   | CoMnWO <sub>4</sub> //AC                                                            | 0 to 1.4             | 5                |
| 3.     | CoWO <sub>4</sub> /MWCNT                               | Hydrothermal                    | Nanosphere                      | 3 M KOH                            | 543 F g <sup>-1</sup> at 5 mV                 | -                                             | -                                                                                   | 0 to 0.55            | 6                |
| 4.     | SrWO <sub>4</sub> /ppy                                 | In-situ chemical polymerisation | Spheres                         | 1 M KOH                            | 373 F g <sup>-1</sup> at 1 Ag <sup>-1</sup>   | -                                             | -                                                                                   | 0 to 0.65            | 7                |
| 5.     | SrWO <sub>4</sub> /g-C <sub>3</sub> N <sub>4</sub>     | Hydrothermal                    | Nanosphere                      | 2 M KOH                            | 1050 C g <sup>-1</sup> at 1 Ag <sup>-1</sup>  | 190.5 C/g at 1 Ag <sup>-1</sup>               | SrWO <sub>4</sub> /g-C <sub>3</sub> N <sub>4</sub> //AC                             | 0 to 1.7             | 8                |
| 6.     | GW-CuWO <sub>4</sub>                                   | Solid-state reaction            | Cube                            | 1 M KOH                            | 520.8 C g <sup>-1</sup> at 1 Ag <sup>-1</sup> | -                                             | -                                                                                   | 0 to 0.5             | 9                |
| 7.     | MWCNT/NiWO <sub>4</sub>                                | Hydrothermal                    | Dispersed granular              | 1 M KOH                            | 885 F g <sup>-1</sup> at 1 Ag <sup>-1</sup>   | 162 F g <sup>-1</sup> at 1 Ag <sup>-1</sup>   | MWCNT/NiWO <sub>4</sub> //AC                                                        | 0 to 1.5             | 10               |
| 8.     | Co <sub>3</sub> O <sub>4</sub> @CoWO <sub>4</sub> /rGO | Hydrothermal                    | Nanoneedles                     | 6 M KOH                            | 386 F g <sup>-1</sup> at 0.5 Ag <sup>-1</sup> | -                                             | Co <sub>3</sub> O <sub>4</sub> @CoWO <sub>4</sub> /rGO//AC                          | 0 to 1.7             | 11               |
| 9.     | MnO <sub>2</sub> /CoWO <sub>4</sub> /NCNO              | Hydrothermal                    | Nanosphere                      | 6 M KOH                            | 536 F g <sup>-1</sup> at 2 Ag <sup>-1</sup>   | 1036 F g <sup>-1</sup> at 2 Ag <sup>-1</sup>  | MnO <sub>2</sub> /CoWO <sub>4</sub> /NCNO/MnO <sub>2</sub> /CoWO <sub>4</sub> /NCNO | -0.7 to 0.8          | 12               |
| 10.    | SrWO <sub>4</sub> /rGO                                 | One-pot Hydrothermal            | Sphere                          | 1 M KOH                            | 727 F g <sup>-1</sup> at 1 Ag <sup>-1</sup>   | 83.6 F g <sup>-1</sup> at 1 Ag <sup>-1</sup>  | SrWO <sub>4</sub> /rGO//AC                                                          | 0 to 1.5             | <b>This work</b> |

**Table S3.** - Electrochemical Performance Comparison of Metal Tungstate-Based Supercapacitor Electrodes

## References

1. M. Govindaraj, B. Sriram, S.-F. Wang, M. K. Muthukumar, S. Kogularasu, G.-P. Chang-Chien and J. Arockia Selvi, *ACS Applied Materials & Interfaces*, 2025, **17**, 11287–11299.
2. M. Govindaraj, U. G. PK, M. K. Muthukumar, K. Sekar, A. Maruthapillai and J. Arockia Selvi, *ChemNanoMat*, 2023, **9**, e202300330.
3. Z. Yan, S. Luo, Q. Li, Z. S. Wu and S. Liu, *Advanced Science*, 2024, **11**, 2302172.
4. H. R. Naderi, A. Sobhani-Nasab, M. Rahimi-Nasrabadi and M. R. Ganjali, *Applied Surface Science*, 2017, **423**, 1025–1034.
5. P. Varatharajan, M. H. Mamat, N. Vasimalai, U. Rajaji and T.-Y. Liu, *Journal of the Taiwan Institute of Chemical Engineers*, 2024, **163**, 105649.
6. A. Ammasi, A. P. Munusamy, M. Shkir, F. Maiz, B. Vellingiri, V. R. M. Reddy and W. K. Kim, *Diamond and Related Materials*, 2023, **139**, 110352.
7. S. Rajkumar, S. Dhineshkumar, N. Arunprakash, P. Raychel and J. P. Merlin, *Optical Materials*, 2023, **142**, 113934.
8. E. Umar, M. W. Iqbal, F. Shaheen, H. Ullah and R. Wahab, *Electrochimica Acta*, 2025, **510**, 145339.
9. S. Kumar, P. Goud, M. A. Ghanem, R. R. Gutturu and S. W. Joo, *Ceramics International*, 2024, **50**, 34270–34282.
10. R. Suganesh, G. Venkatesh, K. Prabu, G. Periyasami, M. Priyadharshini, R. Ranjith and K. Meghanathan, *Journal of Materials Science: Materials in Electronics*, 2025, **36**, 371.
11. X. Xu, Y. Yang, M. Wang, P. Dong, R. Baines, J. Shen and M. Ye, *Ceramics International*, 2016, **42**, 10719–10725.
12. E. Sohoul, K. Adib, B. Maddah and M. Najafi, *Ceramics International*, 2022, **48**, 295–303.
